# Supplementary material for: MicroRNA expression associated with low-grade cervical intraepithelial neoplasia outcomes
Source: PubMed Central journal article supplement (PMC10465678; doi:10.1007/s00432-023-05023-3), 2023-07-08
Supplement: 432_2023_5023_MOESM1_ESM.pdf [file 432_2023_5023_MOESM1_ESM.pdf]

**Supplemental Information 1. microRNAs significantly dysregulated in LGCIN that progressed to HGCIN.** Fold-Δ, fold change in normalized average fluorescent signal intensity. Negative values represent downregulation of miRNA in cases compared to controls. Differential expression of these miRNAs was statistically significant (p<0.01).

| microRNA         | Fold-Δ | p-value               |
|------------------|--------|-----------------------|
| hsa-miR-3196     | -1.80  | 1.18x10 <sup>-3</sup> |
| hsa-miR-4508     | -1.78  | 2.41x10 <sup>-3</sup> |
| hsa-miR-4488     | -2.10  | 3.34x10 <sup>-3</sup> |
| hsa-miR-6089     | -2.18  | 5.47x10 <sup>-3</sup> |
| hsa-miR-638      | -2.10  | 6.01x10 <sup>-3</sup> |
| hsa-miR-6803-5p  | -2.50  | 9.49x10 <sup>-3</sup> |
| hsa-miR-6813-5p  | -2.27  | 1.24x10 <sup>-4</sup> |
| hsa-miR-3940-5p  | -2.73  | 1.40x10 <sup>-4</sup> |
| hsa-miR-2861     | -2.15  | 4.42x10 <sup>-4</sup> |
| hsa-miR-4463     | -1.95  | 7.23x10 <sup>-4</sup> |
| hsa-miR-1587     | -2.03  | 1.05x10 <sup>-3</sup> |
| hsa-miR-1275     | -1.91  | 1.11x10 <sup>-3</sup> |
| hsa-miR-7108-5p  | -2.13  | 1.36x10 <sup>-3</sup> |
| hsa-miR-6743-5p  | -2.68  | 1.40x10 <sup>-3</sup> |
| hsa-miR-1260a    | 1.87   | 2.16x10 <sup>-3</sup> |
| hsa-miR-10226    | -1.83  | 2.90x10 <sup>-3</sup> |
| hsa-miR-320d     | 1.57   | 3.91x10 <sup>-3</sup> |
| hsa-miR-3620-5p  | -2.49  | 3.92x10 <sup>-3</sup> |
| hsa-miR-223-5p   | 4.00   | 4.18x10 <sup>-3</sup> |
| hsa-miR-8069     | -2.19  | 4.21x10 <sup>-3</sup> |
| hsa-miR-3178     | -1.84  | 4.34x10 <sup>-3</sup> |
| hsa-miR-6782-5p  | -2.44  | 4.82x10 <sup>-3</sup> |
| hsa-miR-146b-3p  | 5.00   | 4.89x10 <sup>-3</sup> |
| hsa-miR-4492     | -2.12  | 4.90x10 <sup>-3</sup> |
| hsa-miR-6729-5p  | -2.73  | 5.68x10 <sup>-3</sup> |
| hsa-miR-19a-3p   | 2.67   | 7.44x10 <sup>-3</sup> |
| hsa-miR-10392-5p | -1.84  | 7.89x10 <sup>-3</sup> |
| hsa-miR-6756-5p  | -1.53  | 8.22x10 <sup>-3</sup> |
| hsa-miR-6779-5p  | -1.88  | 9.30x10 <sup>-3</sup> |

**MicroRNA expression associated with low-grade cervical intraepithelial neoplasia outcomes**

*Journal of Cancer Research and Clinical Oncology*

A. Winters<sup>1</sup>, A. Berry<sup>1</sup>, T. Dewenter<sup>2</sup>, N. Chowdhury<sup>1</sup>, K. Wright<sup>1</sup> and J. Cameron<sup>\*1,3</sup>

Departments of <sup>1</sup>Microbiology, Immunology & Parasitology and <sup>2</sup>Pathology and <sup>3</sup>The Stanley S. Scott Cancer Center, Louisiana State University Health Sciences Center, New Orleans, LA, USA

\*Corresponding Author: Jennifer E. Cameron, Ph.D., jcame2@lsuhsc.edu
