# Supplementary material for: MicroRNA expression associated with low-grade cervical intraepithelial neoplasia outcomes
Source: PubMed Central journal article supplement (PMC10465678; doi:10.1007/s00432-023-05023-3), 2023-07-08
Supplement: 432_2023_5023_MOESM3_ESM.pdf [file 432_2023_5023_MOESM3_ESM.pdf]

Supplemental Information 3. Heat map of the KEGG pathways enriched for predicted mRNA targets of the 24 miRNAs significantly downregulated (P<0.01) in LGCIN that progressed to HGGIN.

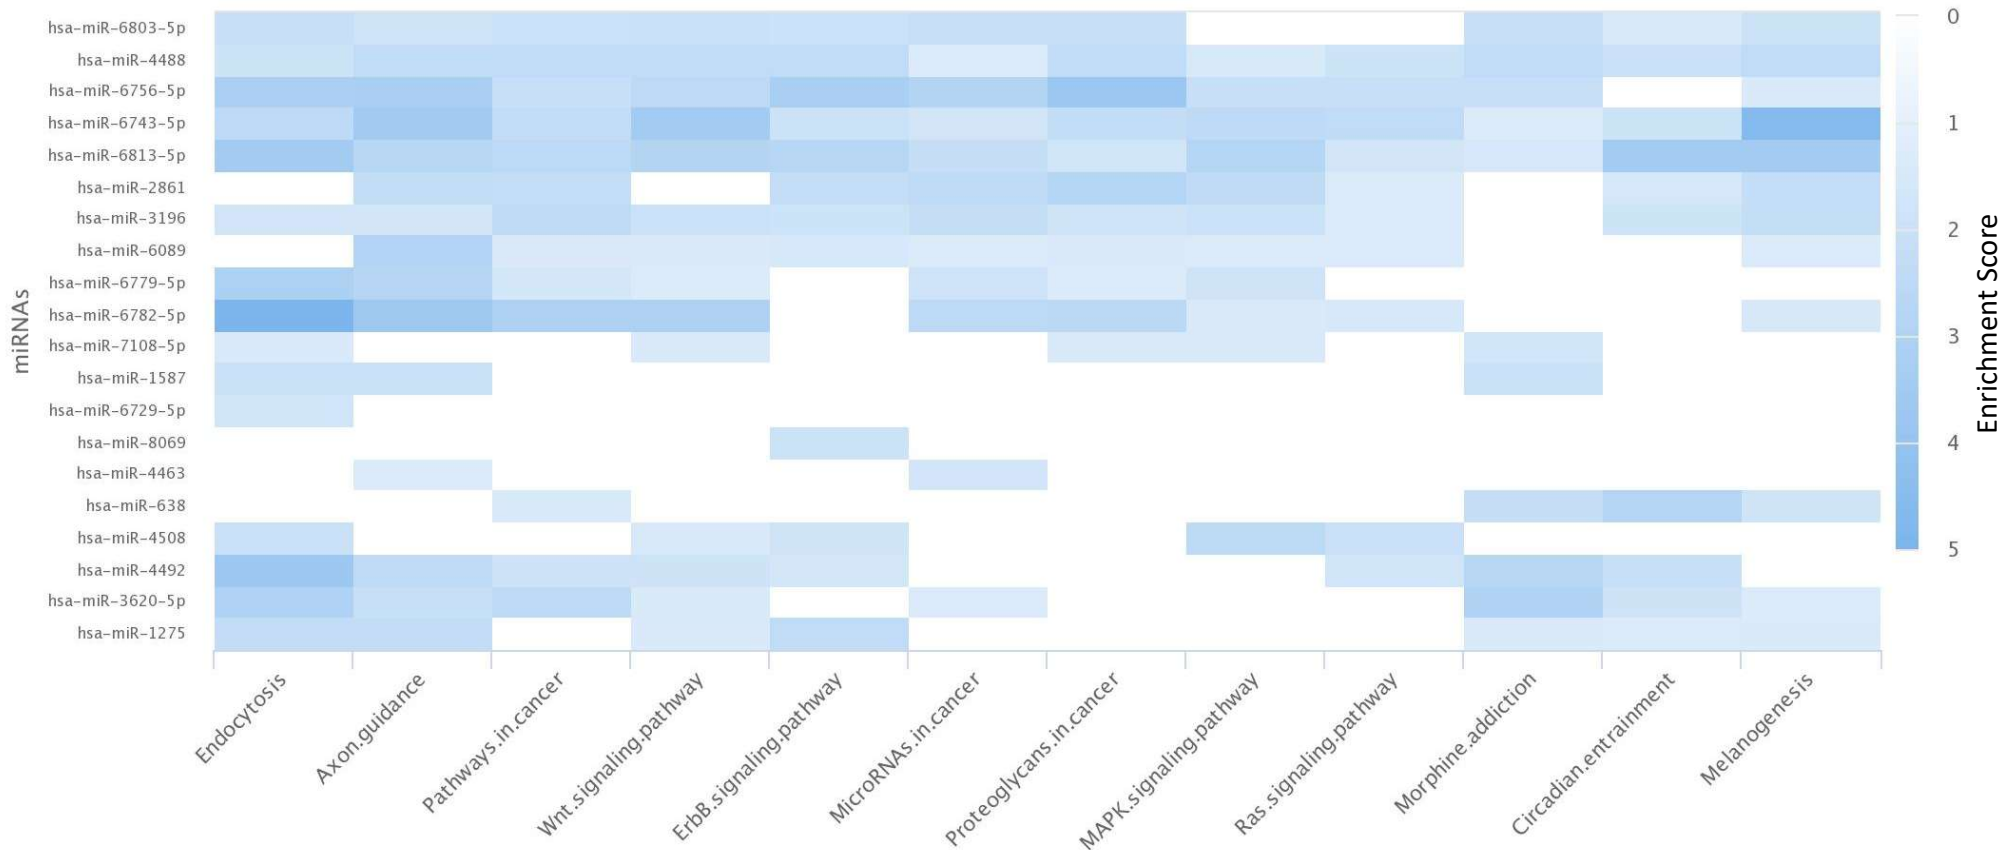

**MicroRNA expression associated with low-grade cervical intraepithelial neoplasia outcomes** *Journal of Cancer Research and Clinical Oncology*

A. Winters<sup>1</sup>, A. Berry<sup>1</sup>, T. Dewenter<sup>2</sup>, N. Chowdhury<sup>1</sup>, K. Wright<sup>1</sup> and J. Cameron<sup>\*1,3</sup>

<sup>\*</sup>Corresponding author: Jennifer E. Cameron, Ph.D., [jcame2@lsuhsc.edu](mailto:jcame2@lsuhsc.edu)

Departments of <sup>1</sup>Microbiology, Immunology & Parasitology and <sup>2</sup>Pathology and <sup>3</sup>The Stanley S. Scott Cancer Center, Louisiana State University Health Sciences Center, New Orleans, LA, USA
